# Supplementary material for: Pdx-1 or Pdx-1-VP16 protein transduction induces β-cell gene expression in liver-stem WB cells
Source: Springer Nature journal article supplement (doi:10.1186/1756-0500-2-3), 2009-01-01
Supplement: Additional file 2 [file 1756-0500-2-3-S2.pdf]

### List of primer information for RT-PCR

| Genes              | Forward primer                     | Reverse primer       | PCR size (bp) | GenBank Accession Number | T <sub>m</sub> (°C) |
|--------------------|------------------------------------|----------------------|---------------|--------------------------|---------------------|
| <b>Actin</b>       | AGCCATGTACGTAGCCATCC               | CTCTCAGCTGTGGTGGTGAA | 228           | V01217                   | 60                  |
| <b>Ngn3</b>        | GAGTGGGTGGGCGTACTCTA               | TTGGAAGTGGGCACTTCGTG | 186           | NM_021700                | 59                  |
| <b>Pdx-1</b>       | GGCTTAACCTAAACGCCACA               | GGGACCGCTCAAGTTTGTA  | 247           | NM_022852                | 59                  |
| <b>NeuroD</b>      | GGATGATCAAAGCCCAAGA                | GCAGGGTACCACCTTTCTCA | 163           | NM_019218                | 59                  |
| <b>Nkx2.2</b>      | GGGGTTTTTCAGTCAAGGACA              | AGTCCGTGCAGGGAGTATTG | 246           | XM_345446                | 60                  |
| <b>Nkx6.1</b>      | ACTTGGCAGGACCAGAGAGA               | GGGCTTGTGTAATCGTCGT  | 209           | NM_031737                | 59                  |
| <b>Pax4</b>        | AGGACGCTACTACCGCACAG               | GGTACAAAGCCCTTCAGCAC | 169           | NM_031799                | 60                  |
| <b>Insulin 1</b>   | CACCTTTGTGGTCCTCACCT               | CCAGTTGGTAGAGGGAGCAG | 232           | NM_019129                | 59                  |
| <b>Insulin 2</b>   | CATCAGCAAGCAGGTYATTG<br>Y : C or T | CACTTGTGGGTCCTCCACTT | 216           | V01243                   | 60                  |
| <b>Glut2</b>       | TAAGGGGCACTGAGGACATC               | TGCCAGCTGTCTGAAAAATG | 216           | J03145                   | 60                  |
| <b>Glucokinase</b> | CAGTGGAGCGTGAAGACAAA               | CTTGGTCCAATTGAGGAGGA | 216           | NM_012565                | 60                  |
| <b>Kir6.2</b>      | GTAGGGGACCTCCGAAAAAG               | TTGGAGTCGATGACGTGGTA | 188           | NM_031358                | 60                  |
| <b>Glucagon</b>    | TCGTGGCTGGATTGTTTGTA               | GTGAATGTGCCCTGTGAATG | 160           | NM_012707                | 60                  |
| <b>PP</b>          | CTATCCACTTGGGTGGCTCT               | ACCTAGGCCTGGTCAGTGTG | 157           | NM_012626                | 59                  |
| <b>Amylase</b>     | GGCCTTCTGGATCTTGAC                 | TCCTTGGGAGAACCATTTTG | 186           | J00703                   | 60                  |
| <b>Albumin</b>     | AAAGCCACCTGCTTTCAAGA               | TCACAGCACCCGTCATACAT | 221           | BC091391                 | 60                  |

Whenever possible, primers were designed to cross intron-exon boundaries in order to avoid genomic DNA amplification. For other primers, RT enzyme was omitted in the reverse transcriptase step of samples serving as negative controls (data not shown).
